# Supplementary material
Source: publisher figshare collection journal article supplement (https://diabetesjournals.figshare.com/articles/dataset/_/15173556)
Supplement: Supplementary file 1 [file 1]

**Cavβ3 regulates Ca<sup>2+</sup>-signalling and insulin expression in pancreatic β cells in a cell-autonomous manner**

Alexander Becker<sup>1,2</sup>, Barbara Wardas<sup>1,2</sup>, Houssein Salah<sup>1</sup>, Maryam Amini<sup>1</sup>, Claudia Fecher-Trost<sup>1</sup>, Qiao Sen<sup>1</sup>, Damian Martus<sup>1</sup>, Andreas Beck<sup>1</sup>, Stephan E. Philipp<sup>1</sup>, Veit Flockerzi<sup>1</sup>, Anouar Belkacemi<sup>1,\*</sup>

<sup>1</sup>Institut für Experimentelle und Klinische Pharmakologie und Toxikologie, Präklinisches Zentrum für Molekulare Signalverarbeitung (PZMS) der Universität des Saarlandes, 66421 Homburg, Germany

<sup>2</sup>contributed equally

\*Correspondence:  
Anouar Belkacemi  
Institut für Experimentelle und Klinische  
Pharmakologie und Toxikologie  
Universität des Saarlandes  
66421 Homburg, Germany  
Phone: +49 6841 1626405  
Fax: +49 6841 1626402  
E-Mail: Anouar.Belkacemi@uks.eu

## Supplementary Figure Legend

**Supplementary Figure 1. Depolarization-induced  $\text{Ca}^{2+}$  entry in wild-type and Cav $\beta$ 3-KO  $\beta$ -cells.** (A) Mean Fura-2 (F340/F380) ratiometric traces in the presence of 2 mM extracellular  $\text{Ca}^{2+}$  before and after addition of 25 mM potassium in wild-type (black) and Cav $\beta$ 3-KO (red) cells. Application of 2  $\mu\text{M}$  nimodipine reduced  $\text{Ca}^{2+}$ -entry. (B) Resting  $\text{Ca}^{2+}$ , peak amplitude and area under the curve of the potassium-induced  $\text{Ca}^{2+}$ -influx, shown as Tukey's box and whiskers with the boxes extend from the 25th to the 75th percentile and the line inside the box shows the median. The inter-quartile ranges (IQR) represent the difference between the 25th and 75th percentiles. Whiskers are extended to the most extreme data point that is no more than  $1.5 \times \text{IQR}$  from the edge of the box and outliers beyond the whiskers are depicted as dots. The indicated P-values were calculated by Mann-Whitney test and the number of measured cells (x) per experiment (y) are indicated as (x/y) in panel B.

**Supplementary Figure 2. Cav $\beta$ 3 inhibits frequency of low (3 mM) glucose induced  $\text{Ca}^{2+}$  oscillations.** (A) Representative Fura-2 (F340/380) ratiometric traces in the presence of extracellular  $\text{Ca}^{2+}$  from wild-type (black) and Cav $\beta$ 3-KO (red)  $\beta$ -cells in the presence of 3 mM extracellular glucose. (B) Numbers of glucose-evoked  $\text{Ca}^{2+}$  oscillations per minute (left) and the mean peak amplitude per cell (right) from experiments in A. (C) Representative Fura-2 (F340/380) ratiometric traces in the presence of extracellular  $\text{Ca}^{2+}$  from wild-type  $\beta$ -cells pretreated with vehicle (+vehicle, black) or 10  $\mu\text{M}$  xestospongine C (+Xest. C, gray) for 20 min and xestospongine C was maintained during the whole experiment. (D) Numbers of glucose-evoked  $\text{Ca}^{2+}$  oscillations per minute (left) and mean peak amplitude per cell (right) from experiments in C. Data in B and C are shown as Tukey's box and whiskers with the boxes extend from the 25th to the 75th percentile and the line inside the box shows the median. The inter-quartile ranges (IQR) represent the difference between the 25th and 75th percentiles. Whiskers are extended to the most extreme data point that is no more than  $1.5 \times \text{IQR}$  from the

edge of the box and outliers beyond the whiskers are depicted as dots. The indicated P-values were calculated by Mann-Whitney test and the number of measured cells (x) per experiment (y) are indicated as (x/y). **(E)** Co-immunoprecipitation of the IP3R3. Immunoprecipitations were performed with antibodies against Cav $\beta$ 3 and anti-IP3-receptor type 3 (IP3R3). Eluted protein complexes were subjected to Western blot using a second independent anti-IP3R3 antibody.

**Supplementary Figure 3.** Full scans for Western blots (uncropped images) which are shown in main Figures 1B, 1C, 4C, 5E,7K and S2E.
