# Supplementary material
Source: publisher figshare collection journal article supplement (https://diabetesjournals.figshare.com/articles/dataset/_/15173556)

# Figure S1

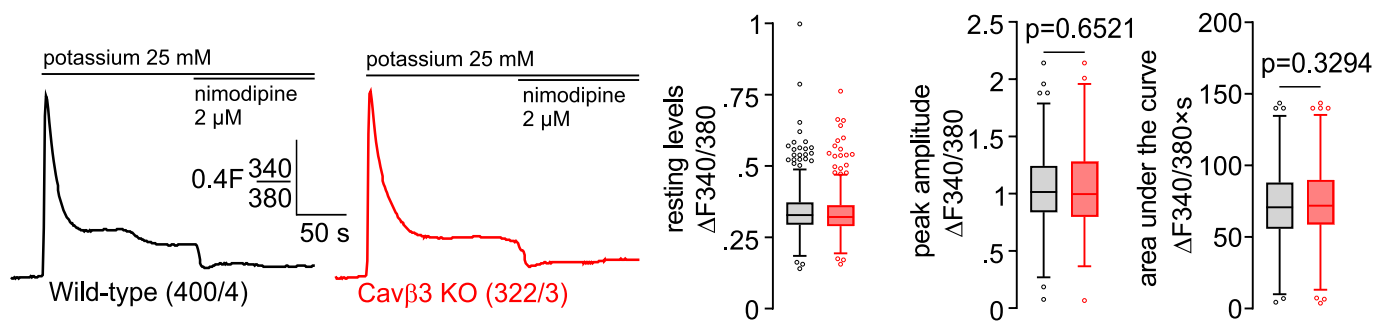

# Figure S2

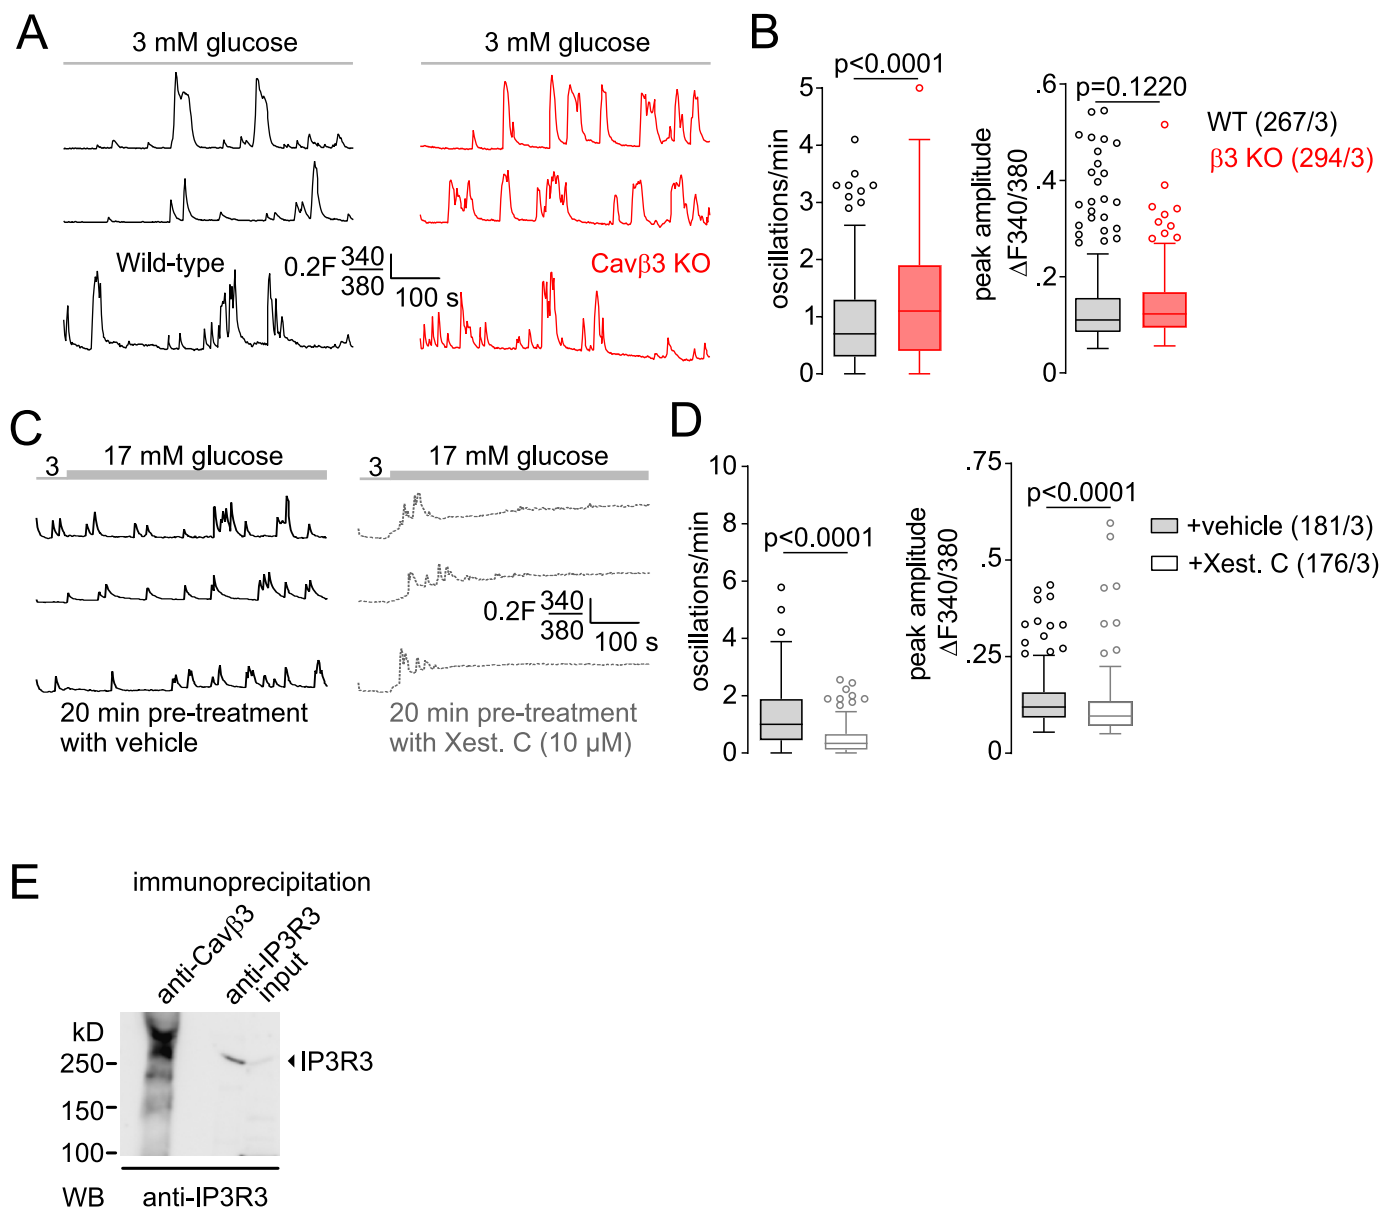

# Figure S3

Full unedited blot for Figure 1B

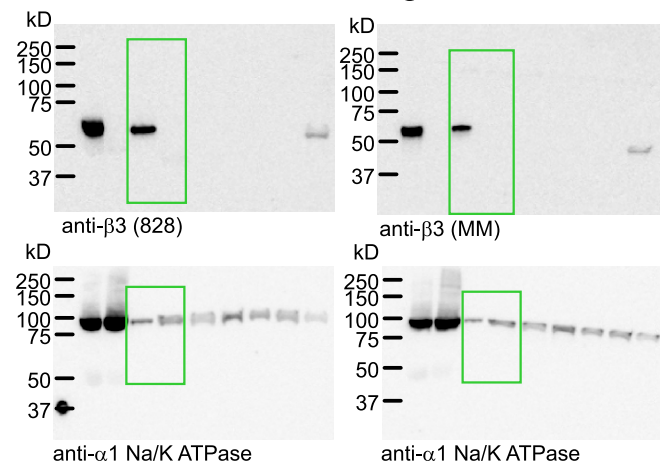

Full unedited blot for Figure 1C

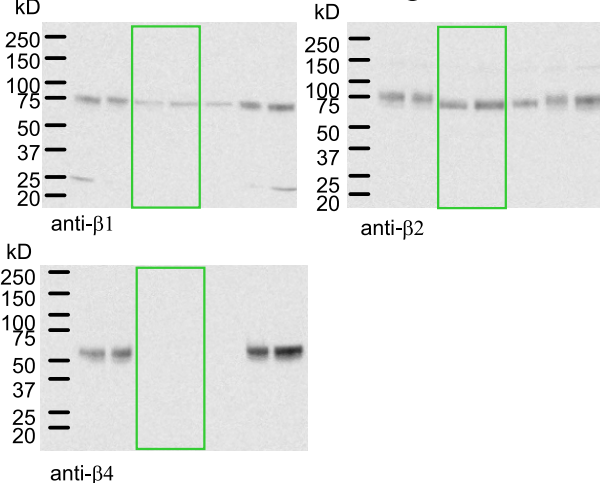

Full unedited blot for Figure 4C

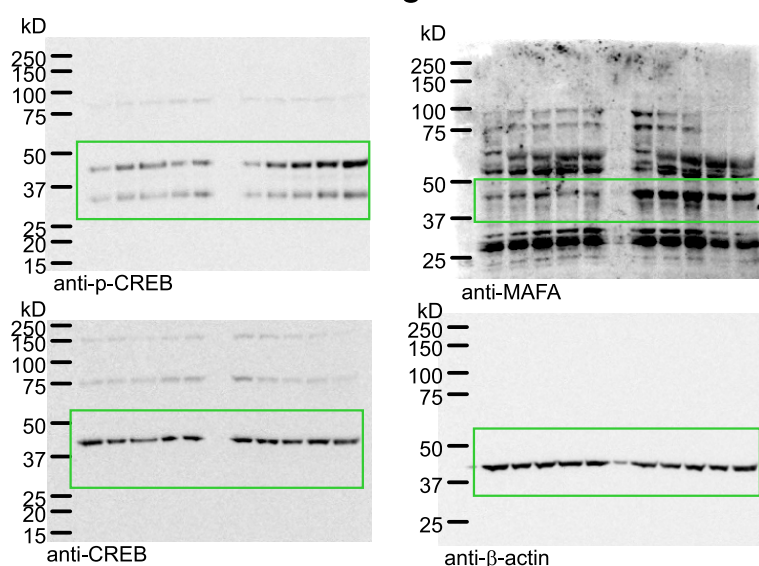

Full unedited blot for Figure 5E

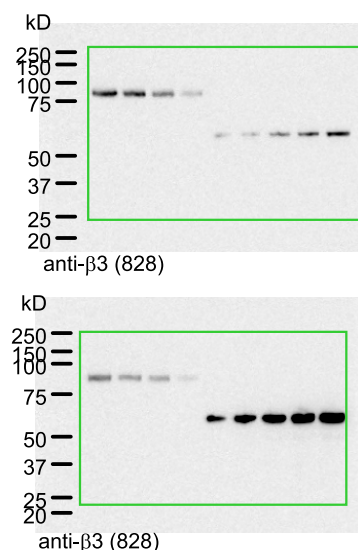

Full unedited blot for Figure 7K

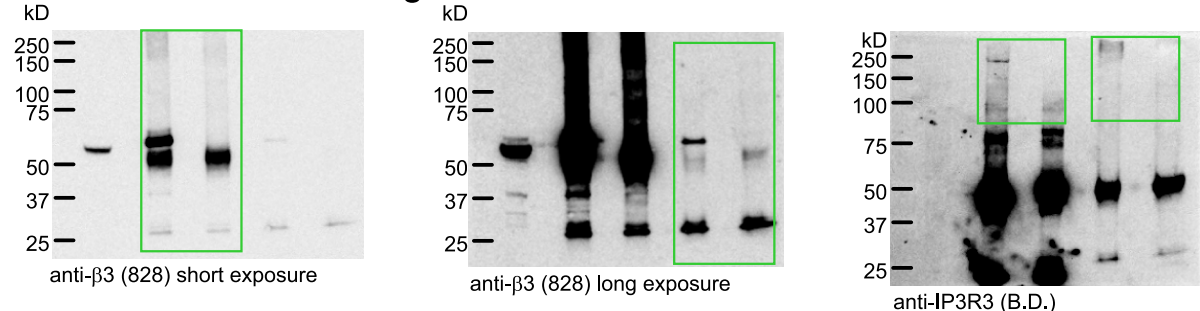

Full unedited blot for Figure S2E

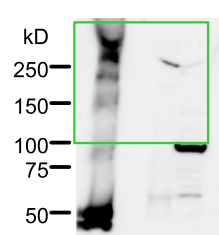

Supplement: Supplementary file 2 [file 1]
